# Supplementary material for: The UbiB family member Cqd1 forms a novel membrane contact site in mitochondria
Source: Oxford University Press journal article supplement (doi:10.1242/jcs.260578), 2023-04-19
Supplement: jcs260578supp.pdf [file jcs260578supp.pdf]

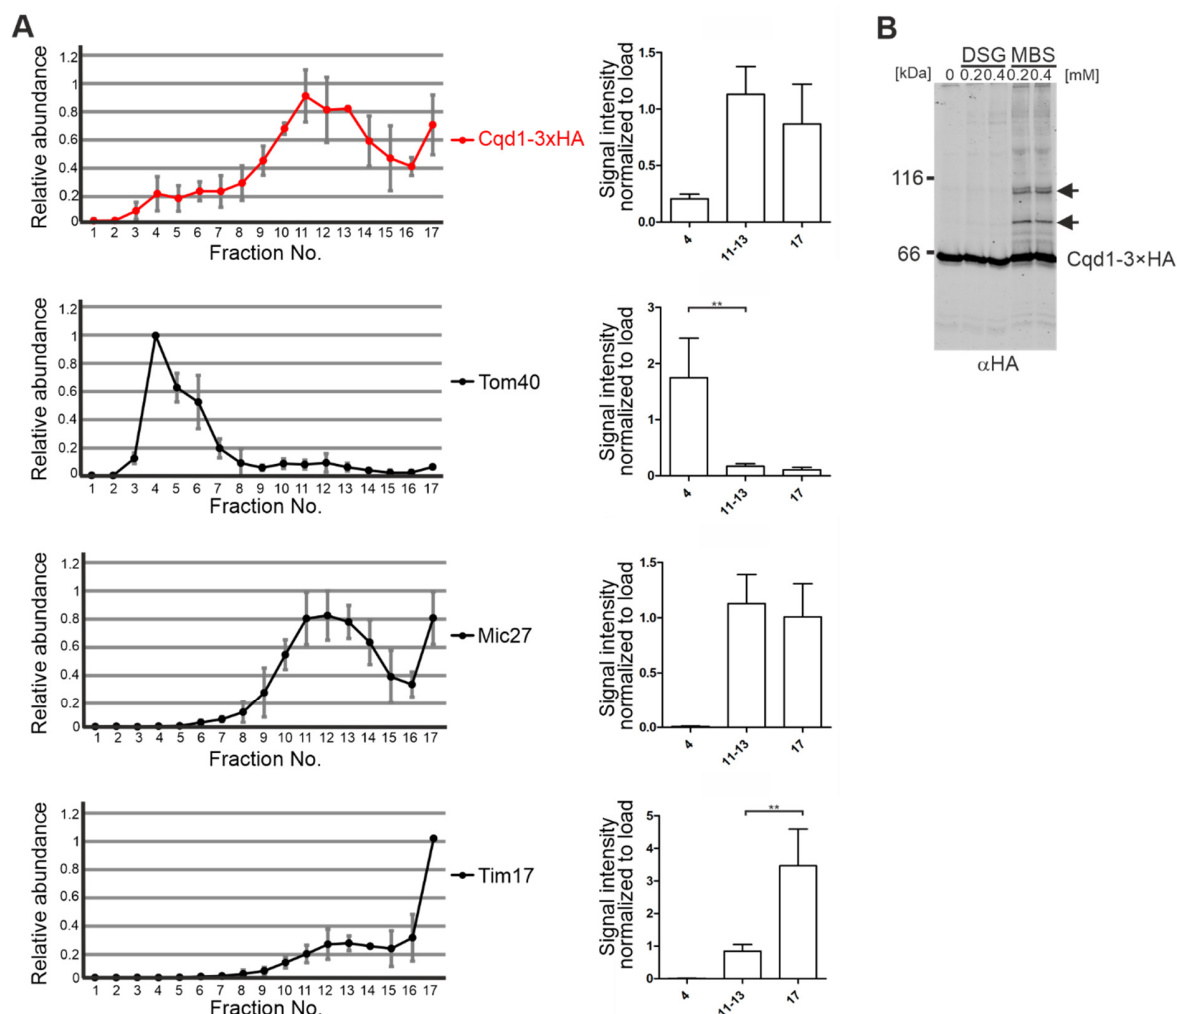

**Fig. S1. Cqd1 is enriched in fractions containing contact site proteins.**

**(A)** (Left) The average of relative protein abundance in three independent experiments described in Fig. 6A is shown. The graph shows mean values of the distribution of Cqd1-3xHA and the marker proteins for the outer membrane (Tom40), the inner membrane (Tim17) and contact sites (Mic27). Error bars indicate standard deviation. (Right) The quantification of the amount of the respective proteins present in low density fractions (No. 4), intermediate density fractions (No. 11-13) and high density fractions (No. 17) is shown as mean from three independent experiments. Quantification was done using Image Studio software. Error bars indicate standard deviation. Asterisks represent p-values obtained by unpaired Student's t test (\*\* $p \leq 0.01$ ). **(B)** Cqd1 interacts with proteins other than itself. Isolated mitochondria of a Cqd1-3xHA expressing strain were exposed to DMSO or the chemical crosslinkers DSG and MBS at the indicated concentrations. Samples were analyzed by immunoblotting with an anti-HA antibody. Arrows indicate Cqd1-containing crosslinks.

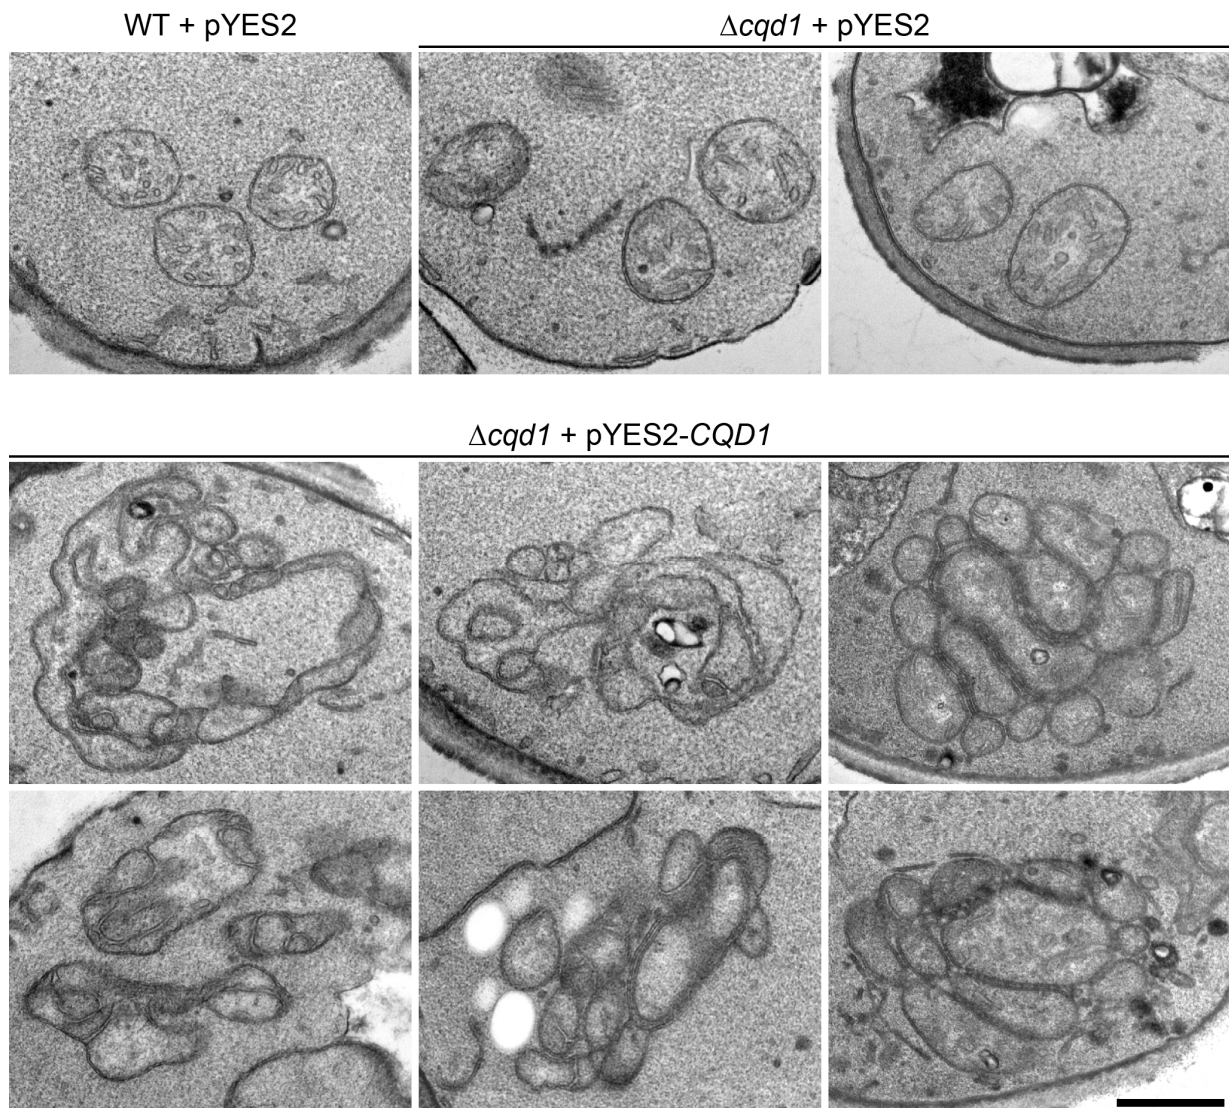

**Fig. S2. CQD1 overexpression is associated with altered mitochondrial architecture.** WT and  $\Delta cqd1$  cells carrying the indicated plasmids were grown and analyzed by electron microscopy as described in Fig. 7D. Scale bar, 500 nm.

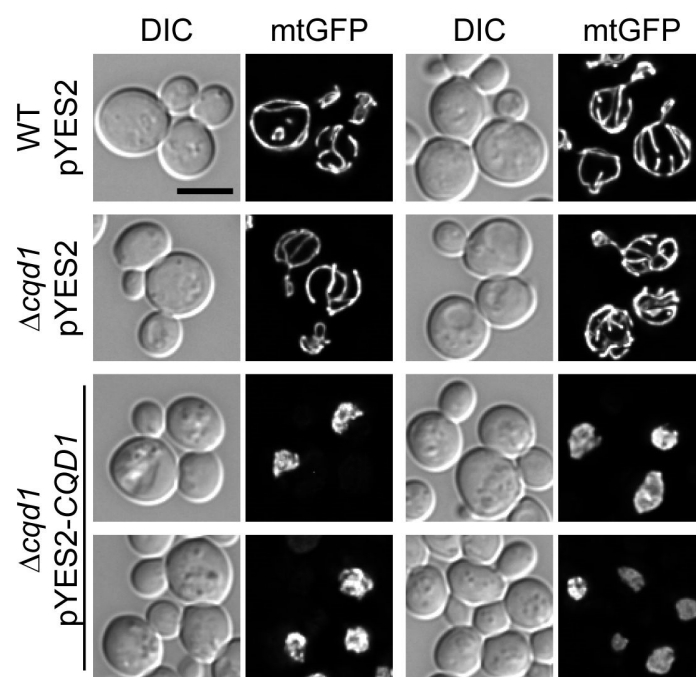

**Fig. S3. Overexpression of *CQD1* causes changes in mitochondrial morphology.**

WT and  $\Delta cqd1$  cells carrying the indicated plasmids and expressing mitochondria-targeted GFP (mtGFP) were grown and analyzed as described in Fig. 7E. Shown are DIC (differential interference contrast) images and maximum intensity projections of deconvolved z stacks (mtGFP) from representative cells. Scale bar, 5  $\mu$ m.

**Fig. 1B**

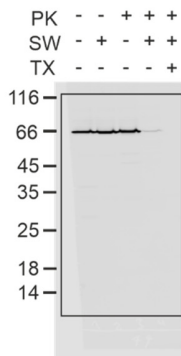

**Fig. 1C**

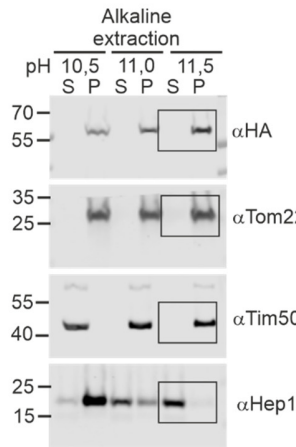

**Fig. 2D**

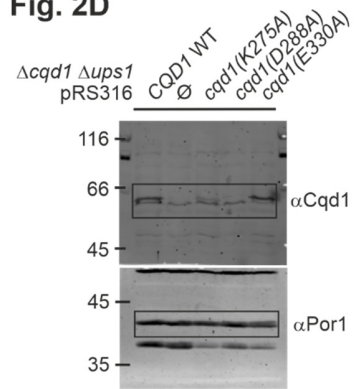

**Fig. 4A**

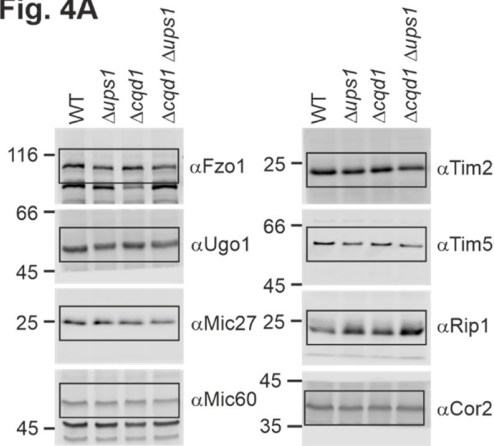

**Fig. 4B**

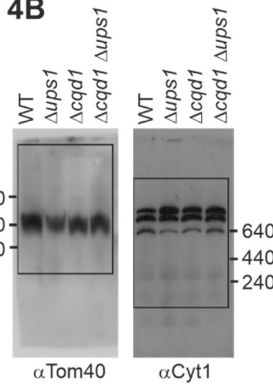

**Fig. 4C**

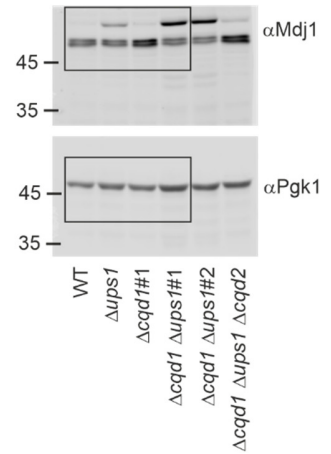

**Fig. 4D**

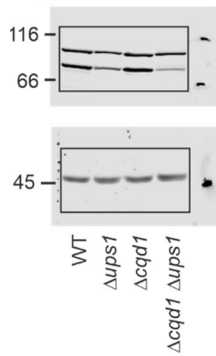

**Fig. 5B**

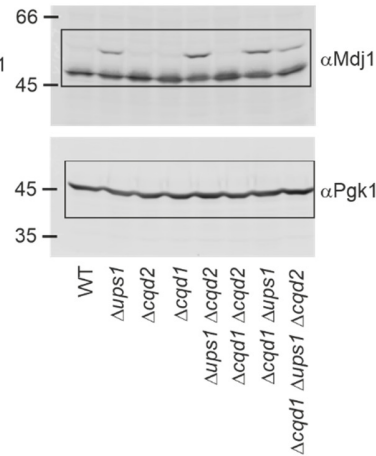

**Fig. 5C**

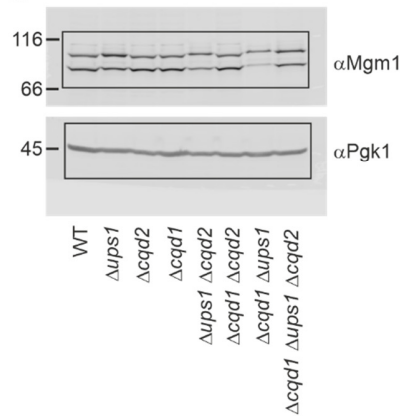

**Fig. 6A**

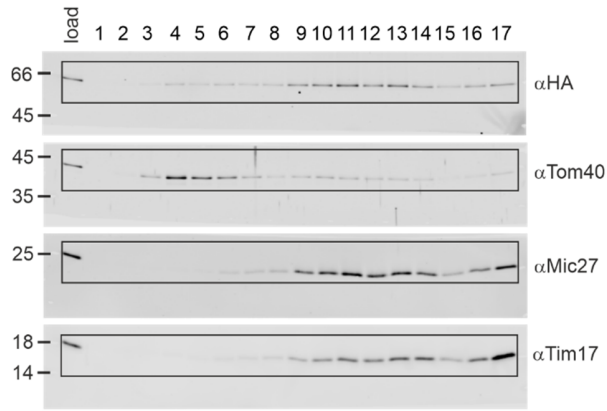

**Fig. 6B**

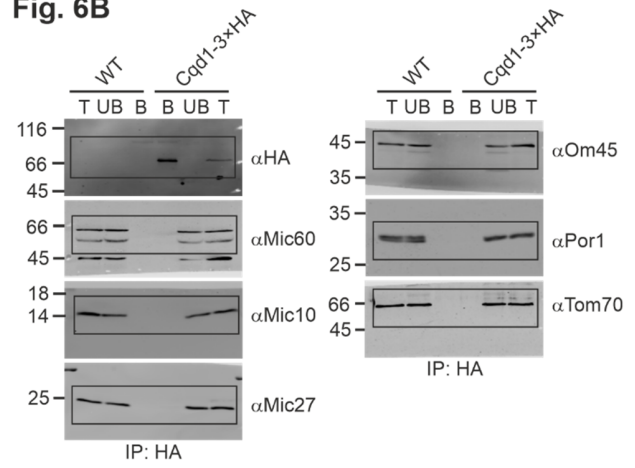

**Fig. 6C**

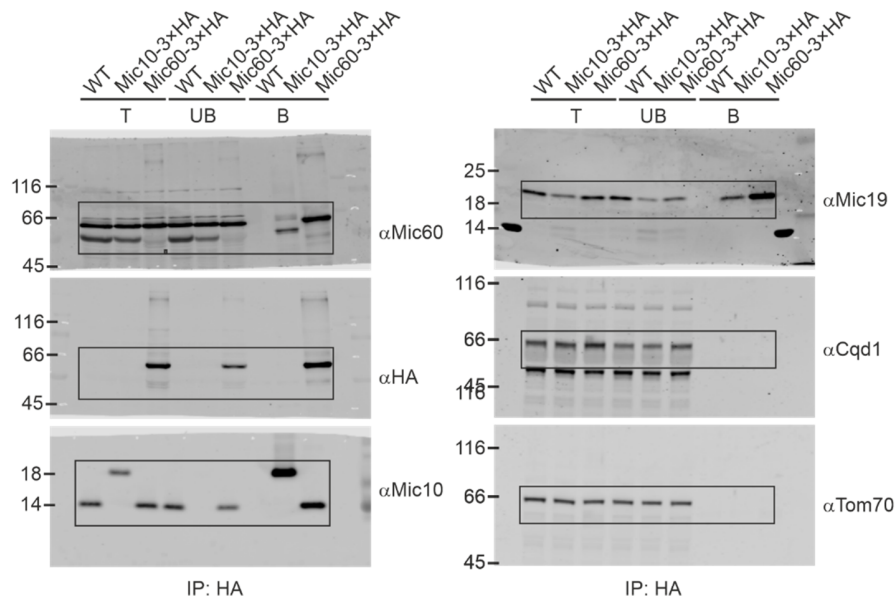

**Fig. 6D**

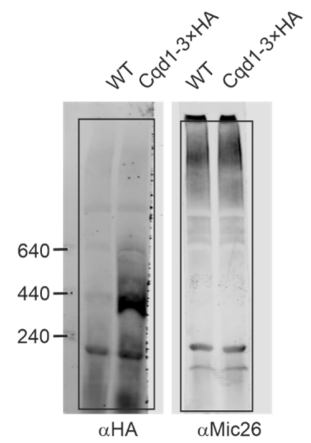

**Fig. 6E**

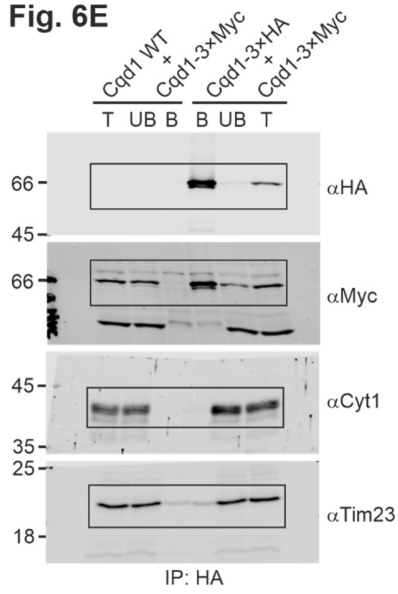

**Fig. 6F**

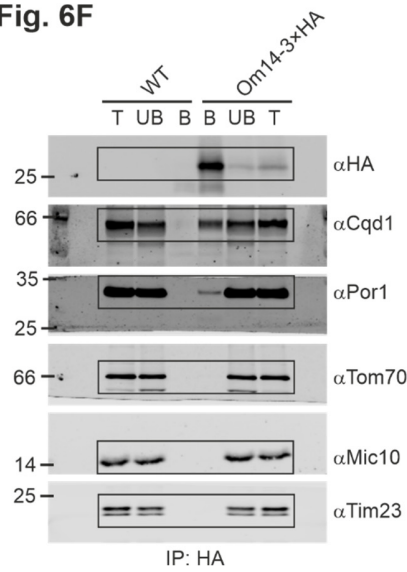

**Fig. 6G**

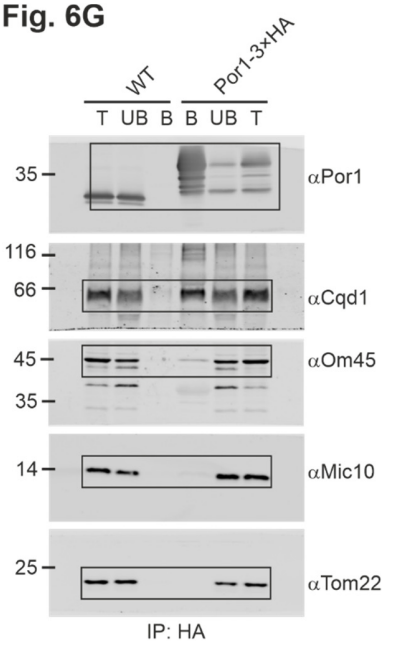

**Fig. 6H**

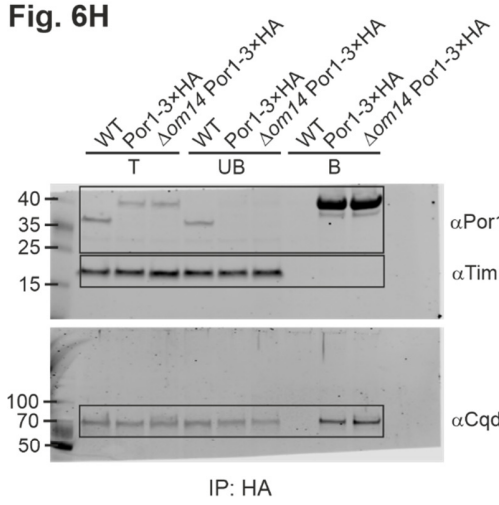

**Fig. 6I**

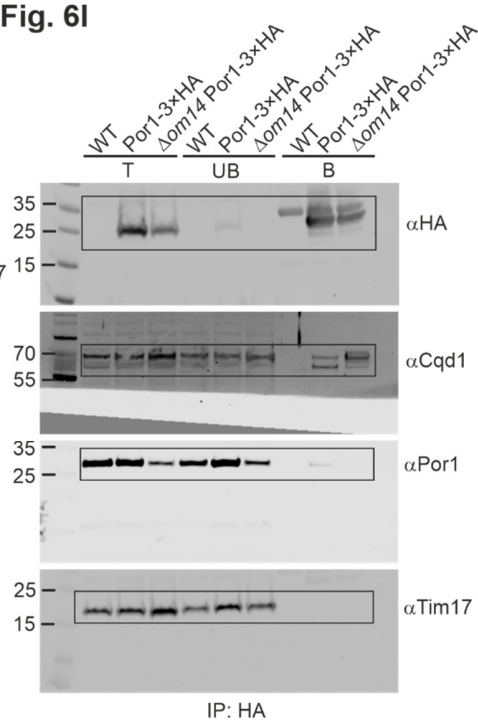

**Fig. 6J**

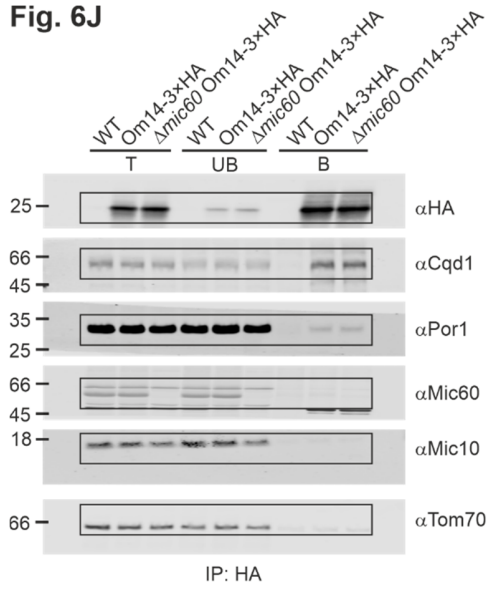

**Fig. 7B**

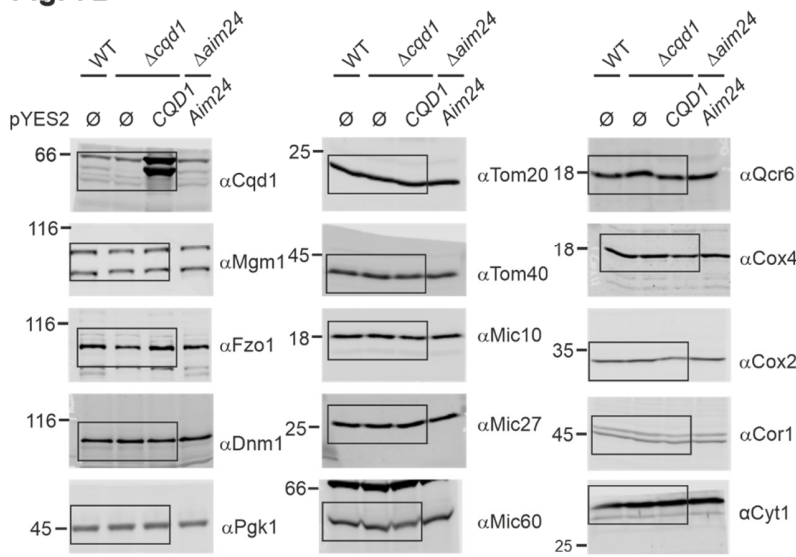

**Fig. 7C**

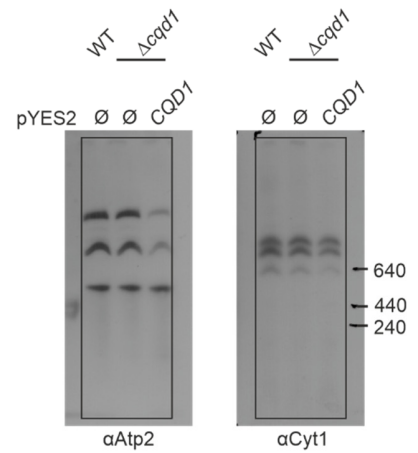

**Fig 8H**

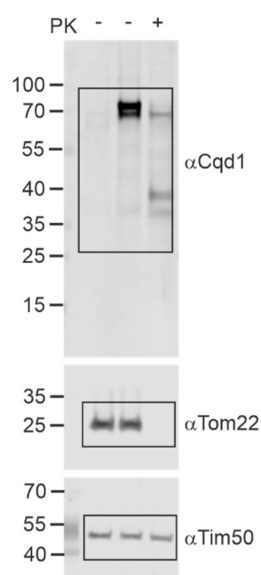

**Fig 8I**

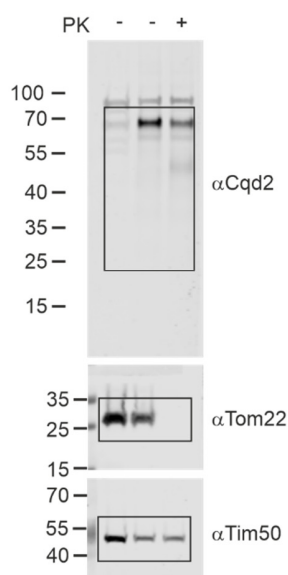

**Fig. S1B**

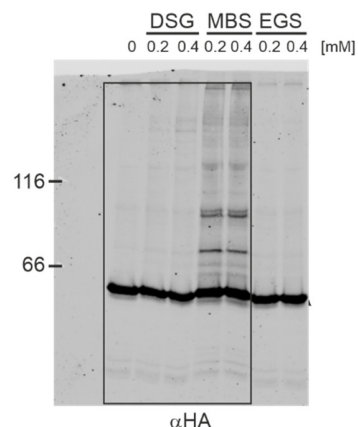

**Fig. S4. Blot transparency**

**Table S1. Relative abundance of mitochondrial phospholipids.**

Values of the graph shown in Figure 3. PC, phosphatidylcholine; PE, phosphatidylethanolamine; PS, phosphatidylserine; PI, phosphatidylinositol; CL, cardiolipin; PG, phosphatidylglycerol; PA, phosphatidic acid; MLCL, monolysocardiolipin.

| average mol % lipid       |       |       |      |       |      |      |       |      |
|---------------------------|-------|-------|------|-------|------|------|-------|------|
| Sample                    | PC    | PE    | PS   | PI    | PG   | PA   | CL    | MLCL |
| WT                        | 36.17 | 27.30 | 5.05 | 16.48 | 0.15 | 4.17 | 10.45 | 0.22 |
| $\Delta ups1$             | 39.34 | 30.59 | 5.18 | 15.55 | 0.13 | 3.03 | 6.15  | 0.04 |
| $\Delta cqd1$             | 40.28 | 25.68 | 4.85 | 15.01 | 0.18 | 3.19 | 10.65 | 0.16 |
| $\Delta ups1 \Delta cqd1$ | 41.17 | 27.69 | 6.94 | 14.12 | 0.12 | 3.41 | 6.49  | 0.07 |
| Standard deviation        |       |       |      |       |      |      |       |      |
| Sample                    | PC    | PE    | PS   | PI    | PG   | PA   | CL    | MLCL |
| WT                        | 5.29  | 3.20  | 0.66 | 4.15  | 0.04 | 0.48 | 1.41  | 0.11 |
| $\Delta ups1$             | 3.12  | 3.80  | 1.22 | 1.81  | 0.10 | 0.16 | 0.61  | 0.03 |
| $\Delta cqd1$             | 1.50  | 2.30  | 0.62 | 1.49  | 0.06 | 0.46 | 1.04  | 0.04 |
| $\Delta ups1 \Delta cqd1$ | 2.36  | 2.17  | 2.15 | 2.27  | 0.04 | 0.80 | 2.13  | 0.07 |



## Table S2. Relative amount of different species of single phospholipids

[Click here to download Table S2](#)

**Table S3. *S. cerevisiae* strains used in this study.**

| Strain name           | Genotype                                                                                           | Reference                   |
|-----------------------|----------------------------------------------------------------------------------------------------|-----------------------------|
| YPH499 ( $\rho^+$ )   | <i>MATa ade2-101 his3-<math>\Delta</math>200 leu2- trp1-<math>\Delta</math>63 ura3-52 lys2-801</i> | (Sikorski and Hieter, 1989) |
| YPH499 ( $\rho^0$ )   | <i>MATa ade2-101 his3-<math>\Delta</math>200 leu2- trp1-<math>\Delta</math>63 ura3-52 lys2-801</i> | Harner et al., 2014         |
| $\Delta$ <i>cqd1</i>  | YPH499 <i>cqd1<math>\Delta</math>::HIS3MX6</i>                                                     | This study                  |
| $\Delta$ <i>cqd2</i>  | YPH499 <i>cqd2<math>\Delta</math>::HIS3MX6</i>                                                     | This study                  |
| $\Delta$ <i>ups1</i>  | YPH499 <i>ups1<math>\Delta</math>::kanMX4</i>                                                      | This study                  |
| $\Delta$ <i>ups1</i>  | YPH499 <i>ups1<math>\Delta</math>::LEU2 (K. lactis)</i>                                            | This study                  |
| $\Delta$ <i>tam41</i> | YPH499 <i>tam41<math>\Delta</math>::LEU2 (K. lactis)</i>                                           | This study                  |
| $\Delta$ <i>pgs1</i>  | YPH499 <i>pgs1<math>\Delta</math>::LEU2 (K. lactis)</i>                                            | This study                  |
| $\Delta$ <i>gep4</i>  | YPH499 <i>gep4<math>\Delta</math>::LEU2 (K. lactis)</i>                                            | This study                  |
| $\Delta$ <i>crd1</i>  | YPH499 <i>crd<math>\Delta</math>::LEU2 (K. lactis)</i>                                             | This study                  |
| $\Delta$ <i>taz1</i>  | YPH499 <i>taz1<math>\Delta</math>::LEU2 (K. lactis)</i>                                            | This study                  |
| $\Delta$ <i>cld1</i>  | YPH499 <i>cld1<math>\Delta</math>::LEU2 (K. lactis)</i>                                            | This study                  |
| $\Delta$ <i>ups2</i>  | YPH499 <i>ups2<math>\Delta</math>::LEU2 (K. lactis)</i>                                            | This study                  |
| $\Delta$ <i>mdm35</i> | YPH499 <i>mdm35<math>\Delta</math>::LEU2 (K. lactis)</i>                                           | This study                  |
| $\Delta$ <i>psd1</i>  | YPH499 <i>psd1<math>\Delta</math>::LEU2 (K. lactis)</i>                                            | This study                  |

|                                       |                                                                                                                  |                       |
|---------------------------------------|------------------------------------------------------------------------------------------------------------------|-----------------------|
| $\Delta por1$                         | YPH499 <i>por1</i> $\Delta::kanMX4$                                                                              | This study            |
| $\Delta om14$                         | YPH499 <i>om14</i> $\Delta::LEU2$ ( <i>K. lactis</i> )                                                           | This study            |
| $\Delta mgm1$                         | YPH499 <i>mgm1</i> $\Delta::kanMX4$                                                                              | Harner et al., 2014   |
| $\Delta fzo1$                         | YPH499 <i>fzo1</i> $\Delta::HIS3MX6$                                                                             | This study            |
| $\Delta ups1 \Delta cqd1$             | YPH499 <i>cqd1</i> $\Delta::HIS3MX6 ups1$ $\Delta::LEU2$ ( <i>K. lactis</i> )                                    | This study            |
| $\Delta ups1 \Delta cqd1$             | YPH499 <i>cqd1</i> $\Delta::HIS3MX6 ups1$ $\Delta::kanMX4$                                                       | This study            |
| $\Delta tam41 \Delta cqd1$            | YPH499 <i>cqd1</i> $\Delta::HIS3MX6 tam41$ $\Delta::LEU2$ ( <i>K. lactis</i> )                                   | This study            |
| $\Delta pgs1 \Delta cqd1$             | YPH499 <i>cqd1</i> $\Delta::HIS3MX6 pgs1$ $\Delta::LEU2$ ( <i>K. lactis</i> )                                    | This study            |
| $\Delta gep4 \Delta cqd1$             | YPH499 <i>cqd1</i> $\Delta::HIS3MX6 gep4$ $\Delta::LEU2$ ( <i>K. lactis</i> )                                    | This study            |
| $\Delta crd1 \Delta cqd1$             | YPH499 <i>cqd1</i> $\Delta::HIS3MX6 crd1$ $\Delta::LEU2$ ( <i>K. lactis</i> )                                    | This study            |
| $\Delta taz1 \Delta cqd1$             | YPH499 <i>cqd1</i> $\Delta::HIS3MX6 taz1$ $\Delta::LEU2$ ( <i>K. lactis</i> )                                    | This study            |
| $\Delta cld1 \Delta cqd1$             | YPH499 <i>cqd1</i> $\Delta::HIS3MX6 cld1$ $\Delta::LEU2$ ( <i>K. lactis</i> )                                    | This study            |
| $\Delta ups2 \Delta cqd1$             | YPH499 <i>cqd1</i> $\Delta::HIS3MX6 ups2$ $\Delta::LEU2$ ( <i>K. lactis</i> )                                    | This study            |
| $\Delta mdm35 \Delta cqd1$            | YPH499 <i>cqd1</i> $\Delta::HIS3MX6 mdm35$ $\Delta::LEU2$ ( <i>K. lactis</i> )                                   | This study            |
| $\Delta psd1 \Delta cqd1$             | YPH499 <i>cqd1</i> $\Delta::HIS3MX6 psd1$ $\Delta::LEU2$ ( <i>K. lactis</i> )                                    | This study            |
| $\Delta cqd1 \Delta cqd2$             | YPH499 <i>cqd2</i> $\Delta::HIS3MX6 cqd1$ $\Delta::kanMX4$                                                       | This study            |
| $\Delta ups1 \Delta cqd2$             | YPH499 <i>ups1</i> $\Delta::kanMX6 cqd2$ $\Delta::hphNT1$                                                        | This study            |
| $\Delta ups1 \Delta cqd2 \Delta cqd1$ | YPH499 <i>cqd2</i> $\Delta::HIS3MX6 cqd1$ $\Delta::kanMX4 ups1$ $\Delta::LEU2$ ( <i>K. lactis</i> )              | This study            |
| CQD1-3xHA                             | YPH499 CQD1-3xHA::HIS3MX6                                                                                        | This study            |
| CQD1-3xMyc                            | YPH499 CQD1::3xMyc::TRP1 ( <i>K. lactis</i> )                                                                    | This study            |
| POR1-3xHA                             | YPH499 POR1-3xHA::HIS3MX6                                                                                        | This study            |
| OM14-3xHA                             | YPH499 OM14-3xHA::HIS3MX6                                                                                        | This study            |
| OM14-3xHA $\Delta por1$               | YPH499 OM14-3xHA::HIS3MX6 <i>por1</i> $\Delta::LEU2$ ( <i>K. lactis</i> )                                        | This study            |
| POR1-3xHA $\Delta om14$               | YPH499 POR1-3xHA::TRP1 ( <i>K. lactis</i> )<br>HIS3MX6 <i>om14</i> $\Delta::LEU2$ ( <i>K. lactis</i> )           | This study            |
| $\Delta mic60$ OM14-3xHA              | YPH499 <i>mic60</i> $\Delta::HIS3MX6 OM14$ -3xHA::TRP1 ( <i>K. lactis</i> )                                      | This study            |
| WT mKate                              | YPH499 <i>ho-PGK1pr-su9-KATE2::kanMX4</i>                                                                        | This study            |
| $\Delta cqd1$ mKate                   | YPH499 <i>cqd1</i> $\Delta::HIS3MX6 ho-PGK1pr-su9-KATE2::kanMX4$                                                 | This study            |
| $\Delta ups1$ mKate                   | YPH499 <i>ups1</i> $\Delta::LEU2$ ( <i>K. lactis</i> ) <i>ho-PGK1pr-su9-KATE2::kanMX4</i>                        | This study            |
| $\Delta ups1 \Delta cqd1$ mKate       | YPH499 <i>ups1</i> $\Delta::LEU2$ ( <i>K. lactis</i> ) <i>cqd1</i> $\Delta::HIS3MX6 ho-PGK1pr-su9-KATE2::kanMX4$ | This study            |
| $\Delta ups1$ CQD1-3xHA               | YPH499 <i>cqd1</i> $\Delta::CQD1$ -3xHA::HIS3MX6 <i>ups1</i> $\Delta::LEU2$ ( <i>K. lactis</i> )                 | This study            |
| MIC10-3xHA                            | YPH499 MIC10-3xHA::HIS3MX6                                                                                       | (Harner et al., 2011) |
| MIC60-3xHA                            | YPH499 MIC60-3xHA::kanMX4                                                                                        | (Harner et al., 2011) |

**Table S4. Primers used in this study.**

| Construct                               | Primer name          | Sequence                                         |
|-----------------------------------------|----------------------|--------------------------------------------------|
| pYES2-CQD1                              | CQD1(SacI) for       | CCCGAGTCATGTCATTTTTAAAGTTTCGC                    |
|                                         | CQD1-int(EcoRI)_rev  | CCCGAATTCACGTAATATAGGCAGCGAACTTTCAATAAGTCCAAG    |
|                                         | CQD1-int(EcoRI) for  | CGTGAATTCGGGTTTAAGC                              |
|                                         | CQD1(NotI) rev       | CCCGCGGCCGCTTAATAATTAGGACACAATTG                 |
| pRS316-CQD1                             | F HindIII CQD1 (gib) | GCAGGAATTCGATATCAAGCTTGGTACTGGAAAGATCGCGTTC      |
|                                         | R XhoI CQD1          | CTTACCGGGCCCCCCTCGACGTACCGTTGCCTTATTGTTTC        |
| pRS316-cqd1(K275A)                      | Cqd1_K275A for       | GCGATCTTGCATCCAAATGTAAG                          |
|                                         | Cqd1_K275A rev       | GATGGCACACCAACGATTTTC                            |
| pRS316-cqd1(D288A)                      | Cqd1_D288A for       | GCTTTGAAAATAATGAAATTCTG                          |
|                                         | Cqd1_D288A rev       | TCTCCGGATCTGAGATCTTAC                            |
| pRS316-cqd1(E330A)<br>pYES2-cqd1(E330A) | Cqd1_E330A for       | GCGGCGTTAAACCTGGAAAG                             |
|                                         | Cqd1_E330A rev       | AATTCTTAGATCCAACCTGAATA                          |
| pRS316-CQD1-3xHA                        | F HindIII CQD1 (gib) | GCAGGAATTCGATATCAAGCTTGGTACTGGAAAGATCGCGTTC      |
|                                         | Gib(XhoI)ADH1terR1   | ACCGGGCCCCCCTCGAGGTAGAGGTGTGGTCAATAAG            |
| pYES2-CQD2                              | CQD2(SacI) for       | CCCGAGTCATGATGACCAAAGCTTTTTTTAAC                 |
|                                         | CQD2(XhoI)_rev       | CCCCTCGAGTTAAGATGACAACCAAGTCTTCG                 |
| pYX233-CQD2                             | pYXCQD2 (EcoRI)_for  | CTACAAAAACACATACAGGAATTCATGATGACC<br>AAAGCTTTTTT |
|                                         | pYXCQD2(NheI)_rev    | ATTGTTCTTATTTCAGTTAGCTAGCTTAAGATGAC<br>AACCAAGTC |

**Table S5. Antibodies used in this study.**

| <b>Antibody</b>                    | <b>Source</b>       | <b>Identifier/Reference</b> | <b>Dilution</b> |
|------------------------------------|---------------------|-----------------------------|-----------------|
| Mouse monoclonal anti-HA           | Santa Cruz          | Cat. #sc-7392               | 1:250           |
| Mouse monoclonal anti-Pgk1         | Life Technologies   | Cat. #459250                | 1:250           |
| Mouse monoclonal anti-Pgk1         | MPI of Biochemistry | (Izawa et al., 2017)        | 1:250           |
| Rabbit polyclonal anti-Cqd1        | LMU Munich          | This study                  | 1:25            |
| Rabbit polyclonal anti-Cqd2        | LMU Munich          | This study                  | 1:25            |
| Rabbit polyclonal anti-Tim17       | LMU Munich          | (Moro et al., 1999)         | 1:500           |
| Rabbit polyclonal anti-Tim23       | LMU Munich          | (Moro et al., 1999)         | 1:500           |
| Rabbit polyclonal anti-Tim50       | LMU Munich          | (Mokranjac et al., 2003)    | 1:500           |
| Rabbit polyclonal anti-Tom20       | LMU Munich          | (Krimmer et al., 2001)      | 1:500           |
| Rabbit polyclonal anti-Tom22       | LMU Munich          | (Krimmer et al., 2001)      | 1:500           |
| Rabbit polyclonal anti-Tom40       | LMU Munich          | (Kiebler et al., 1990)      | 1:1,000         |
| Rabbit polyclonal anti-Tom70       | LMU Munich          | (Schlossmann et al., 1996)  | 1:500           |
| Rabbit polyclonal anti-Hep1        | LMU Munich          | (Sichting et al., 2005)     | 1:250           |
| Rabbit polyclonal anti-Atp2        | LMU Munich          | (Izawa et al., 2017)        | 1:1,000         |
| Rabbit polyclonal anti-Fzo1        | LMU Munich          | (Basch et al., 2020)        | 1:250           |
| Rabbit polyclonal anti-Ugo1        | LMU Munich          | (Basch et al., 2020)        | 1:250           |
| Rabbit polyclonal anti-Mgm1        | LMU Munich          | (Harner et al., 2016)       | 1:250           |
| Rabbit polyclonal anti-Dnm1        | LMU Munich          | (Harner et al., 2016)       | 1:250           |
| Rabbit polyclonal anti-Mdj1        | LMU Munich          | (Rowley et al., 1994)       | 1:250           |
| Rabbit polyclonal anti-Mic10       | LMU Munich          | (Harner et al., 2011)       | 1:250           |
| Rabbit polyclonal anti-Mic19       | LMU Munich          | (Harner et al., 2011)       | 1:250           |
| Rabbit polyclonal anti-Mic26       | LMU Munich          | (Harner et al., 2011)       | 1:250           |
| Rabbit polyclonal anti-Mic27       | LMU Munich          | (Harner et al., 2011)       | 1:250           |
| Rabbit polyclonal anti-Mic60       | LMU Munich          | (Harner et al., 2011)       | 1:250           |
| Rabbit polyclonal anti-Por1        | LMU Munich          | (Krimmer et al., 2001)      | 1:1,000         |
| Rabbit polyclonal anti-Om45        | LMU Munich          | (Waizenegger et al., 2003)  | 1:250           |
| Rabbit polyclonal anti-Rip1        | LMU Munich          | (Cruciat et al., 1999)      | 1:250           |
| Rabbit polyclonal anti-Cor1        | LMU Munich          | (Cruciat et al., 2000)      | 1:250           |
| Rabbit polyclonal anti-Cor2        | LMU Munich          | (Vogel et al., 2006)        | 1:250           |
| Rabbit polyclonal anti-Cyt1        | LMU Munich          | (Izawa et al., 2017)        | 1:250           |
| Rabbit polyclonal anti-Cox2        | LMU Munich          | (Izawa et al., 2017)        | 1:250           |
| Rabbit polyclonal anti-Cox4        | LMU Munich          | (Cruciat et al., 2000)      | 1:250           |
| Rabbit polyclonal anti-Qcr6        | LMU Munich          | (Cruciat et al., 1999)      | 1:250           |
| IRDye 680RD Goat anti-Mouse IgG    | LI-COR              | Cat. #962-68070             | 1:10,000        |
| IRDye 800CW Goat anti-Rabbit IgG   | LI-COR              | Cat. #926-32211             | 1:10,000        |
| Goat Anti-Rabbit IgG-HRP Conjugate | BIO-RAD             | Cat. #170-6515              | 1:10,000        |

## Supplementary References

- Basch, M., Wagner, M., Rolland, S., Carbonell, A., Zeng, R., Khosravi, S., Schmidt, A., Aftab, W., Imhof, A., Wagener, J., *et al.* (2020). Msp1 cooperates with the proteasome for extraction of arrested mitochondrial import intermediates. *Mol Biol Cell* **31**, 753-767.
- Cruciat, C.M., Brunner, S., Baumann, F., Neupert, W., and Stuart, R.A. (2000). The cytochrome bc1 and cytochrome c oxidase complexes associate to form a single supracomplex in yeast mitochondria. *J Biol Chem* **275**, 18093-18098.
- Cruciat, C.M., Hell, K., Folsch, H., Neupert, W., and Stuart, R.A. (1999). Bcs1p, an AAA-family member, is a chaperone for the assembly of the cytochrome bc(1) complex. *EMBO J* **18**, 5226-5233.
- Harner, M., Korner, C., Walther, D., Mokranjac, D., Kaesmacher, J., Welsch, U., Griffith, J., Mann, M., Reggiori, F., and Neupert, W. (2011). The mitochondrial contact site complex, a determinant of mitochondrial architecture. *EMBO J* **30**, 4356-4370.
- Harner, M.E., Unger, A.K., Geerts, W.J., Mari, M., Izawa, T., Stenger, M., Geimer, S., Reggiori, F., Westermann, B., and Neupert, W. (2016). An evidence based hypothesis on the existence of two pathways of mitochondrial crista formation. *Elife* **5**.
- Izawa, T., Park, S.H., Zhao, L., Hartl, F.U., and Neupert, W. (2017). Cytosolic Protein Vms1 Links Ribosome Quality Control to Mitochondrial and Cellular Homeostasis. *Cell* **171**, 890-903 e818.
- Kiebler, M., Pfaller, R., Sollner, T., Griffiths, G., Horstmann, H., Pfanner, N., and Neupert, W. (1990). Identification of a mitochondrial receptor complex required for recognition and membrane insertion of precursor proteins. *Nature* **348**, 610-616.
- Krimmer, T., Rapaport, D., Ryan, M.T., Meisinger, C., Kassenbrock, C.K., Blachly-Dyson, E., Forte, M., Douglas, M.G., Neupert, W., Nargang, F.E., *et al.* (2001). Biogenesis of porin of the outer mitochondrial membrane involves an import pathway via receptors and the general import pore of the TOM complex. *J Cell Biol* **152**, 289-300.
- Mokranjac, D., Paschen, S.A., Kozany, C., Prokisch, H., Hoppins, S.C., Nargang, F.E., Neupert, W., and Hell, K. (2003). Tim50, a novel component of the TIM23 preprotein translocase of mitochondria. *EMBO J* **22**, 816-825.
- Moro, F., Sirrenberg, C., Schneider, H.C., Neupert, W., and Brunner, M. (1999). The TIM17.23 preprotein translocase of mitochondria: composition and function in protein transport into the matrix. *EMBO J* **18**, 3667-3675.
- Rowley, N., Prip-Buus, C., Westermann, B., Brown, C., Schwarz, E., Barrell, B., and Neupert, W. (1994). Mdj1p, a novel chaperone of the DnaJ family, is involved in mitochondrial biogenesis and protein folding. *Cell* **77**, 249-259.
- Schlossmann, J., Lill, R., Neupert, W., and Court, D.A. (1996). Tom71, a novel homologue of the mitochondrial preprotein receptor Tom70. *J Biol Chem* **271**, 17890-17895.
- Sichting, M., Mokranjac, D., Azem, A., Neupert, W., and Hell, K. (2005). Maintenance of structure and function of mitochondrial Hsp70 chaperones requires the chaperone Hep1. *Embo J* **24**, 1046-1056.
- Sikorski, R.S., and Hieter, P. (1989). A system of shuttle vectors and yeast host strains designed for efficient manipulation of DNA in *Saccharomyces cerevisiae*. *Genetics* **122**, 19-27.
- Vogel, F., Bornhovd, C., Neupert, W., and Reichert, A.S. (2006). Dynamic subcompartmentalization of the mitochondrial inner membrane. *J Cell Biol* **175**, 237-247.
- Waizenegger, T., Stan, T., Neupert, W., and Rapaport, D. (2003). Signal-anchor domains of proteins of the outer membrane of mitochondria: structural and functional characteristics. *J Biol Chem* **278**, 42064-42071.
